# Supplementary material for: Chinese Yam and Its Active Components Regulate the Structure of Gut Microbiota and Indole-like Metabolites in Anaerobic Fermentation In Vitro
Source: MDPI journal article supplement (doi:10.3390/nu15245112), 2023-12-14
Supplement: s1 [file s1]

*Calculation of the content of indole derivatives*

Generate the standard curve using the concentration of the standard substance on the x-axis and the OD value on the y-axis. By substituting the OD value of the sample into the equation, determine the actual concentration of the sample.

The regression equation for the standard curve:

IAA:  $y = -0.0084x + 2.1965$ ;  $R^2 = 0.996$ .

LA:  $y = -0.003x + 1.8176$ ;  $R^2 = 0.999$ .

TRP:  $y = -0.137x + 3.0972$ ;  $R^2 = 0.985$ .

ILA:  $y = 9.3903x - 0.769$ ;  $R^2 = 0.992$ .
